# Supplementary material for: Ad35 and Ad26 Vaccine Vectors Induce Potent and Cross-Reactive Antibody and T-Cell Responses to Multiple Filovirus Species
Source: PLoS One. 2012 Dec 6;7(12):e44115. doi: 10.1371/journal.pone.0044115 (PMC3516506; doi:10.1371/journal.pone.0044115)
Supplement: Table S1 — Characterization of adenoviral vectors. All adenoviral vectors were characterized by determination of vector particle (VP) to infectious units (IU) ratio, transgene sequencing, and expression by western blot. All vectors were purified by Caesium chloride (CsCL) density purification. (PDF) [file pone.0044115.s001.pdf]

**Supplemental table 1:**

| Vector Name  | Lot number | VP/IU ratio | Transgene sequence* | Purification method | Transgene expression |
|--------------|------------|-------------|---------------------|---------------------|----------------------|
| Ad35.Ebo(Z)  | G430-016   | 10          | confirmed           | CsCl purified       | verified             |
| Ad35.Mar(A)  | G748-037   | 7           | confirmed           | CsCl purified       | verified             |
| Ad35.Ebo(SG) | G619-019A  | 9           | confirmed           | CsCl purified       | verified             |
| Ad35.Ebo(IC) | H539-037A  | 3           | confirmed           | CsCl purified       | verified             |
| Ad35.Mar(R)  | H700-003A  | 6           | confirmed           | CsCl purified       | verified             |
| Ad26.Ebo(SG) | H539-074A  | 18          | confirmed           | CsCl purified       | verified             |
| Ad26.Ebo(Z)  | H001-060A  | 11          | confirmed           | CsCl purified       | verified             |
| Ad26.Ebo(IC) | H539-085A  | 24          | confirmed           | CsCl purified       | Verified             |
| Ad26.Mar(A)  | H129-067A  | 10          | confirmed           | CsCl purified       | verified             |
| Ad26.Mar(R)  | H539-092A  | 12          | confirmed           | CsCl purified       | verified             |
| Ad35.empty   | G849-053A  | 3           | confirmed           | CsCl purified       | NA                   |
| Ad26.empty   | G737-070A  | 26          | confirmed           | CsCl purified       | NA                   |

\* Transgene integrity was verified by sequence analysis.

NA: Not applicable
